# Supplementary material for: Identification of renal ischemia reperfusion injury-characteristic genes, pathways and immunological micro-environment features through bioinformatics approaches
Source: publisher site journal article supplement (doi:10.18632/aging.205471), 2024-02-06
Supplement: Supplementary file [file aging-v16i3-205471-supplementary-material-SD1.pdf]

SUPPLEMENTARY FIGURE

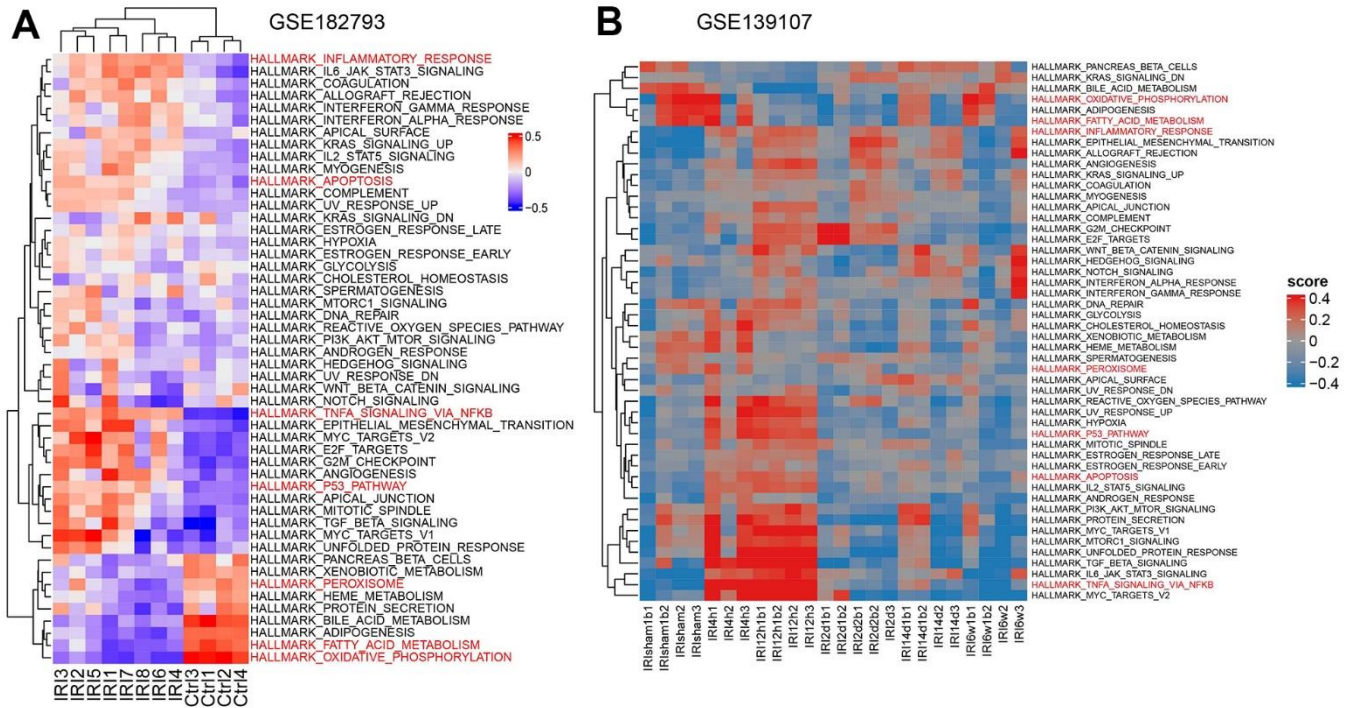

Supplementary Figure 1. GSEA analysis of external datasets. (A) GSEA results of GSE182793. (B) GSEA results of GSE139107.
